# Supplementary material for: A Questionnaire-based Study Exploring Participant Perspectives in a Perinatal Human Challenge Trial
Source: PubMed Central journal article supplement — Pediatr Infect Dis J. 2023 Jul 18;42(11):935–41. doi: 10.1097/INF.0000000000004036 (PMC10569679; doi:10.1097/inf.0000000000004036), 2023-07-18
Supplement: inf-42-0935-s001.pdf [file inf-42-0935-s001.pdf]

## Lactamica 9: Defining upper respiratory colonisation and microbiome evolution in mother-infant pairs following *Neisseria lactamica* inoculation in late pregnancy

**Chief Investigators:** Dr CE Jones & Prof RC Read

**Principal Investigator:** Dr AA Theodosiou

### Please initial each box if you agree with the statement:

1. I confirm that I have read and understood the participant information sheet for the above study. I have had the opportunity to consider the information, ask questions, and have these answered.
2. I understand that my participation is voluntary, and that I am free to withdraw at any time without giving a reason, without any penalty to my own or my baby's medical care or legal rights.
3. I understand that there may be no direct benefit to me or my baby from participating in this study.
4. I agree to having nose, throat and saliva swabs taken, and to nose and saliva swabs being collected from my baby, for storage and use in this study. I understand that these swabs may contain my own and my baby's cells and DNA, but this DNA will not be analysed in this study or in future studies.
5. I agree for samples collected from me and my baby to be stored for use in future infection and immunity studies, subject to appropriate scientific and ethical review.
6. If I withdraw (or if I am withdrawn) from the study, I agree for any information and samples collected prior to my withdrawal to be stored and used anonymously in this study and in future studies. I also agree for the research team to contact me for safety reasons following my withdrawal.
7. I agree for my participation in this study to be documented in my medical notes and in a letter to my GP. I agree to my medical records being accessed by doctors and nurses involved in this study, as well as by monitors auditing the conduct of this study. I agree to be registered on The Over-volunteering Prevention System ([www.TOPS.org.uk](http://www.TOPS.org.uk)).
8. I agree to participate in this study.

### *Items 9 to 14 are optional, and do not affect eligibility to participate in the study.*

9. I agree to provide expressed breast milk samples at Visits 3, 4, 5 and 6. Y  N
10. I agree for an umbilical cord blood sample to be collected at Visit 3. Y  N
11. I agree for a blood sample to be collected from my baby at Visits 5 and 6. Y  N
12. I agree for a blood sample to be collected from me at Visit 6. Y  N
13. I agree to saliva and throat swabs from my other children (<5 years) at Visit 6. Y  N
14. I agree to complete two questionnaires about my experiences in this study. Y  N

**Participant name (print):**

---

**Study doctor name (print):**

---

**Participant signature:**

---

**Study doctor signature:**

---

**Date (dd/mm/yyyy):**

---

**Date (dd/mm/yyyy):**

---
