# Supplementary material for: A Questionnaire-based Study Exploring Participant Perspectives in a Perinatal Human Challenge Trial
Source: PubMed Central journal article supplement — Pediatr Infect Dis J. 2023 Jul 18;42(11):935–41. doi: 10.1097/INF.0000000000004036 (PMC10569679; doi:10.1097/inf.0000000000004036), 2023-07-18
Supplement: inf-42-0935-s002.pdf [file inf-42-0935-s002.pdf]

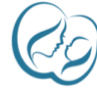

Lac9Q1: Questionnaire 1

1. How did you hear about the Lactamica 9 study?

Please tick ALL that apply:

- Letter by post from the study team
- Advertisement on social media (e.g. Twitter, Facebook) or website
- Advertisement in a healthcare setting (e.g. hospital, GP surgery)
- Advertisement in a public place (e.g. bus stop, park) or business (e.g. coffee shop, gym)
- By word of mouth
- Other

If Other, please provide details:

2. To what extent do you agree with the following statements?

Please tick ONE for each statement:

| <b>"I volunteered for this study to..."</b>                | <b>Strongly agree</b> | <b>Agree</b> | <b>Disagree</b> | <b>Strongly disagree</b> |
|------------------------------------------------------------|-----------------------|--------------|-----------------|--------------------------|
| Contribute to science and the NHS                          |                       |              |                 |                          |
| Learn about the research topic                             |                       |              |                 |                          |
| Improve my own health                                      |                       |              |                 |                          |
| Improve my baby's health                                   |                       |              |                 |                          |
| Receive £100 compensation for my time and inconvenience    |                       |              |                 |                          |
| Have contact with study doctors during and after pregnancy |                       |              |                 |                          |
| Help protect other babies and mothers from infection       |                       |              |                 |                          |

Please provide details, including any other reasons for volunteering:

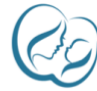

3. To what extent do you agree with the following statements?  
Please tick ONE for each statement:

| <b>“Prior to starting the study, I was concerned about...”</b>               | <b>Strongly agree</b> | <b>Agree</b> | <b>Disagree</b> | <b>Strongly disagree</b> |
|------------------------------------------------------------------------------|-----------------------|--------------|-----------------|--------------------------|
| The risks of <i>N. lactamica</i> nose drops to my own health                 |                       |              |                 |                          |
| The risks of <i>N. lactamica</i> nose drops to my baby’s health              |                       |              |                 |                          |
| My own discomfort caused by <i>N. lactamica</i> nose drops                   |                       |              |                 |                          |
| My own discomfort caused by collecting nose, throat, saliva and milk samples |                       |              |                 |                          |
| My baby’s discomfort caused by collecting nose and saliva samples            |                       |              |                 |                          |
| My baby’s discomfort caused by collecting blood samples                      |                       |              |                 |                          |
| Having to visit the hospital for study visits                                |                       |              |                 |                          |
| Nothing<br>(I had no concerns about the study)                               |                       |              |                 |                          |

Please provide details, including any other concerns:

|  |
|--|
|  |
|--|

4. Which of these do you feel *N. lactamica* nose drops are most similar to?  
Please tick ONE of the following:

|                                                         |  |
|---------------------------------------------------------|--|
| Probiotic supplements that you can buy over-the-counter |  |
| Antibiotics prescribed by a doctor                      |  |
| Vaccinations in a national public health programme      |  |
| Bacteria used in laboratory experiments                 |  |

Further details or comments:

|  |
|--|
|  |
|--|



5. Which three words best describe how you see *N. lactamica* nose drops?  
Please tick THREE of the following:

|              |                          |
|--------------|--------------------------|
| Natural      | <input type="checkbox"/> |
| Controlled   | <input type="checkbox"/> |
| New          | <input type="checkbox"/> |
| Experimental | <input type="checkbox"/> |
| Infection    | <input type="checkbox"/> |
| Bacteria     | <input type="checkbox"/> |
| Protective   | <input type="checkbox"/> |

|             |                          |
|-------------|--------------------------|
| Unknown     | <input type="checkbox"/> |
| Safe        | <input type="checkbox"/> |
| Alternative | <input type="checkbox"/> |
| Healthy     | <input type="checkbox"/> |
| Risk        | <input type="checkbox"/> |
| Balance     | <input type="checkbox"/> |
| Unnatural   | <input type="checkbox"/> |

Further details or comments:

\*\*\*\*\*

Thank you for completing this questionnaire. Your answers above will be stored anonymously, and will not be linked to the rest of the forms documenting your participation in the Lactamica9 study. However, if you would like us to contact you to discuss your answers in more detail, or to share any further concerns, please add your details below (please note this means that your answers will no longer be anonymous).

Complete your details ONLY if you would like us to contact you to discuss your answers:

Name: \_\_\_\_\_

Email: \_\_\_\_\_

Tel: \_\_\_\_\_



Lac9Q2: Questionnaire 2

1. To what extent do you agree with these statements about study design and conduct?  
Please tick ONE for each statement:

|                                                                     | <b>Strongly agree</b> | <b>Agree</b> | <b>Disagree</b> | <b>Strongly disagree</b> | <b>Not applicable</b> |
|---------------------------------------------------------------------|-----------------------|--------------|-----------------|--------------------------|-----------------------|
| The aims of the study were explained in sufficient detail           |                       |              |                 |                          |                       |
| The risks of the study were explained in sufficient detail          |                       |              |                 |                          |                       |
| The study procedures were explained in sufficient detail            |                       |              |                 |                          |                       |
| The study team were easy to contact                                 |                       |              |                 |                          |                       |
| I felt able to approach the study team with any concerns that I had |                       |              |                 |                          |                       |
| The number and duration of study visits was appropriate             |                       |              |                 |                          |                       |
| The amount of compensation offered was appropriate                  |                       |              |                 |                          |                       |

2. To what extent do you agree with these statements about study design and conduct?  
Please tick ONE for each statement:

|                                                                | <b>Strongly agree</b> | <b>Agree</b> | <b>Disagree</b> | <b>Strongly disagree</b> | <b>Not applicable</b> |
|----------------------------------------------------------------|-----------------------|--------------|-----------------|--------------------------|-----------------------|
| I found the inoculation procedure acceptable / tolerable       |                       |              |                 |                          |                       |
| I found the collection of swabs from me acceptable / tolerable |                       |              |                 |                          |                       |
| I found the collection of breast milk acceptable / tolerable   |                       |              |                 |                          |                       |
| I was satisfied with how swabs were collected from my baby     |                       |              |                 |                          |                       |
| I was satisfied with how blood was collected from my baby      |                       |              |                 |                          |                       |

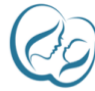

3. Please list one (or more) things you liked about the study design and conduct:

4. Please list one (or more) things you didn't like about the study design and conduct, or anything you think should be changed in future studies:

\*\*\*\*\*

Thank you for completing this questionnaire. Your answers above will be stored anonymously, and will not be linked to the rest of the forms documenting your participation in the Lactamica9 study. However, if you would like us to contact you to discuss your answers in more detail, or to share any further concerns, please add your details below (please note this means that your answers will no longer be anonymous).

Complete your details ONLY if you would like us to contact you to discuss your answers:

Name: \_\_\_\_\_

Email: \_\_\_\_\_

Tel: \_\_\_\_\_
